# Supplementary material for: A Multi-Analyte Approach for Improved Sensitivity of Liquid Biopsies in Prostate Cancer
Source: PubMed Central journal article supplement (PMC7465186; doi:10.3390/cancers12082247), 2020-08-11
Supplement: cancers-12-02247-s001.pdf [file cancers-12-02247-s001.pdf]

Article

# A Multi-Analyte Approach for Improved Sensitivity of Liquid Biopsies in Prostate Cancer

Lilli Hofmann, Katja Sallinger, Christoph Haudum, Maria Smolle, Ellen Heitzer, Tina Moser, Michael Novy, Kevin Gesson, Thomas Kroneis, Thomas Bauernhofer and Amin El-Heliebi

## Supplementary Materials

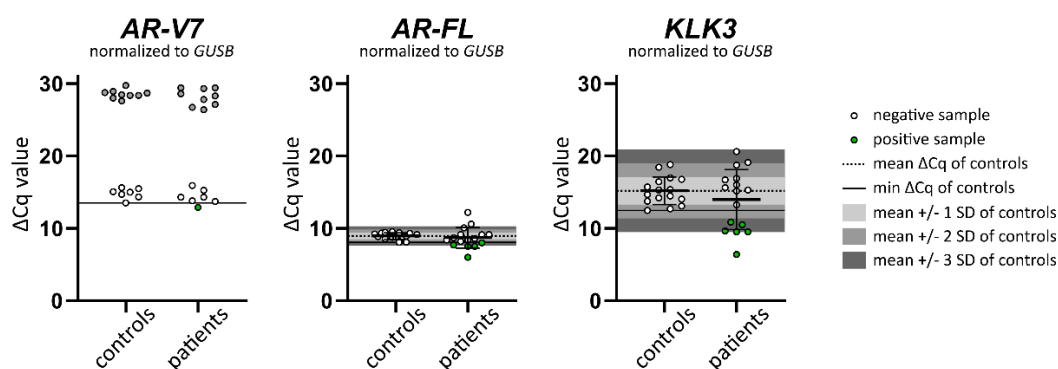

**Figure S1.** Expression levels of *AR-V7*, *AR-FL*, and *KLK3* in whole blood. Following reverse transcription and preamplification, the expression of *AR-V7*, *AR-FL*, *KLK3*, and *GUSB* in whole blood of CRPC patients ( $n = 16$ ) and healthy controls ( $n = 16$ ) was analyzed by qPCR assays. Cq values were normalized to *GUSB* ( $\Delta Cq$ ). For *AR-V7*, nine control samples and nine patient samples yielded no Cq values (45 qPCR cycles). They were assigned a Cq value of 46, normalized to *GUSB*, and plotted as grey data points. After normalization to *GUSB*, the lowest  $\Delta Cq$  value of the control samples was used as threshold for positive tests, as indicated by the black line. Positive tests are depicted as green data points. For *AR-FL* and *KLK3*, mean and standard deviation (SD) were calculated. The mean of control samples is visualized by the dotted line, and 1, 2, or 3 SD from the mean of the control samples are shaded in grey. Using the lowest  $\Delta Cq$  of the control samples or 2 SD from the mean  $\Delta Cq$  of the control samples as cut-off yielded equal results and no false positives in the control group. However, as mean and SD cannot be calculated for *AR-V7* due to the assigned Cq values of 46, the lowest  $\Delta Cq$  of the control samples was used as cut-off for all transcripts.

**Table S1.** Normalized  $\Delta Cq$  values for *AR-V7*, *AR-FL*, and *KLK3* in lysed whole blood.

|           | $\Delta Cq$ <i>AR-V7</i> Normalized to <i>GUSB</i> |          | $\Delta Cq$ <i>AR-FL</i> Normalized to <i>GUSB</i> |          | $\Delta Cq$ <i>KLK3</i> Normalized to <i>GUSB</i> |          |
|-----------|----------------------------------------------------|----------|----------------------------------------------------|----------|---------------------------------------------------|----------|
|           | Control                                            | Patients | Control                                            | Patients | Control                                           | Patients |
|           | 15.6                                               | 12.9     | 8.75                                               | 6        | 15.7                                              | 19.1     |
|           | 14.35                                              | 13.8     | 8.85                                               | 8.4      | 18.45                                             | 15.3     |
|           | 15.05                                              | 13.7     | 8.85                                               | 8.2      | 16.75                                             | 16.9     |
|           | 13.5                                               | 15.9     | 8.75                                               | 8        | 18.8                                              | 6.4      |
|           | 15.5                                               | 14.3     | 9.4                                                | 7.5      | 16.95                                             | 8.5      |
|           | 28.7                                               | 26.7     | 8.9                                                | 7.7      | 14.45                                             | 10.5     |
|           | 29.75                                              | 14.3     | 8.55                                               | 7.5      | 14.65                                             | 8.5      |
|           | 28                                                 | 27.1     | 8.1                                                | 9.1      | 13.75                                             | 16       |
|           | 27.6                                               | 27.8     | 8.8                                                | 8.4      | 13.1                                              | 15.6     |
|           | 15                                                 | 28.3     | 8.05                                               | 8.7      | 14.2                                              | 16.7     |
|           | 28.9                                               | 29.4     | 9.35                                               | 9.15     | 15.3                                              | 13.25    |
|           | 28.75                                              | 26.4     | 9.2                                                | 9.15     | 15.35                                             | 20.6     |
|           | 28.35                                              | 29.3     | 9.3                                                | 12.2     | 12.45                                             | 15.15    |
|           | 28.35                                              | 15.25    | 9.15                                               | 8.6      | 14.05                                             | 18.75    |
|           | 28.45                                              | 28.6     | 9.55                                               | 10.6     | 16.45                                             | 10.85    |
|           | 14.7                                               | 29.4     | 9.45                                               | 10.05    | 12.7                                              | 9.45     |
| mean      | N.A.                                               | N.A.     | 8.94                                               | 8.70     | 15.19                                             | 13.98    |
| 1 SD      | N.A.                                               | N.A.     | 0.45                                               | 1.42     | 1.90                                              | 4.14     |
| 2 SD      | N.A.                                               | N.A.     | 0.90                                               | 2.84     | 3.81                                              | 8.28     |
| 3 SD      | N.A.                                               | N.A.     | 1.34                                               | 4.27     | 5.71                                              | 12.43    |
| mean-1 SD | N.A.                                               | N.A.     | 8.49                                               | 7.28     | 13.29                                             | 9.84     |
| mean-2 SD | N.A.                                               | N.A.     | 8.04                                               | 5.86     | 11.39                                             | 5.70     |
| mean-3 SD | N.A.                                               | N.A.     | 7.59                                               | 4.44     | 9.48                                              | 1.56     |
| min       | 13.50                                              | –        | 8.05                                               | –        | 12.45                                             | –        |

$\Delta Cq$  values of control and patient samples. Several control and patient samples had undetermined  $Cq$  values for *AR-V7*. They were set to  $Cq$  46 and normalized to *GUSB* ( $\Delta Cq$  values printed in red). Including these artificial values into the calculation of mean and SD would introduce substantial bias. Likewise, excluding the samples from the calculation would also introduce bias. Therefore, mean and SD were not calculated for *AR-V7* (N.A.–not available). Different cut-offs were applied to identify positive samples and the samples were highlighted accordingly:

mean-1 SD of controls  
 mean-2 SD of controls  
 mean-3 SD of controls

Lowest (min)  $\Delta Cq$  of controls are marked in green. Using the lowest  $\Delta Cq$  of the control samples or 2 SD from the mean  $\Delta Cq$  of the control samples as cut-off yielded the same results and no false positives in the control group. However, as mean and SD cannot be calculated for *AR-V7* due to the assigned  $Cq$  values of 46, the lowest  $\Delta Cq$  of the control samples was used as cut-off for all transcripts.

**Table S2.** Univariate linear regression model analysing correlation of biomarkers with change in PSA.

| Change in PSA            | Coef.   | 95% CI  |        | SE     | <i>p</i> -Value |
|--------------------------|---------|---------|--------|--------|-----------------|
|                          |         | Lower   | Upper  |        |                 |
| In situ <i>AR-V7</i>     | -233.44 | -519.37 | 52.49  | 134.88 | 0.103           |
| In situ <i>AR-FL</i>     | 27.70   | -387.44 | 442.84 | 195.83 | 0.899           |
| In situ <i>KLK3</i>      | -60.30  | -431.00 | 310.71 | 175.00 | 0.735           |
| RT-qPCR <i>AR-V7</i>     | -106.64 | -656.23 | 442.96 | 254.40 | 0.682           |
| RT-qPCR <i>AR-FL</i>     | 255.18  | -16.90  | 527.26 | 125.94 | 0.064           |
| RT-qPCR <i>KLK3</i>      | 111.19  | -162.55 | 384.92 | 126.71 | 0.396           |
| Plasma-Seq <i>AR amp</i> | 157.22  | -314.66 | 629.10 | 204.63 | 0.464           |
| Multi-analyte            | -17.36  | -509.88 | 475.16 | 232.33 | 0.941           |
| CTC count                | -15.30  | -66.62  | 36.03  | 24.21  | 0.536           |

Legend: Coef.: coefficient; 95% CI: 95% confidence interval; SE: standard error.

**Table S3.** Influence of liquid biopsy markers on overall survival.

| Overall Survival         | HR    | 95% CI |        | <i>p</i> -Value |
|--------------------------|-------|--------|--------|-----------------|
|                          |       | Lower  | Upper  |                 |
| In situ <i>AR-V7</i>     | 1.185 | 0.205  | 6.839  | 0.850           |
| In situ <i>AR-FL</i>     | 0.522 | 0.059  | 4.618  | 0.559           |
| In situ <i>KLK3</i>      | 0.501 | 0.057  | 4.406  | 0.533           |
| RT-qPCR <i>AR-V7</i>     | 3.517 | 0.361  | 34.213 | 0.279           |
| RT-qPCR <i>AR-FL</i>     | 2.359 | 0.386  | 14.359 | 0.354           |
| RT-qPCR <i>KLK3</i>      | 1.325 | 0.220  | 7.986  | 0.759           |
| Plasma-Seq <i>AR amp</i> | 3.321 | 0.260  | 42.470 | 0.356           |
| Multi-analyte            | 0.698 | 0.081  | 6.000  | 0.743           |
| CTC count                | 0.913 | 0.684  | 1.218  | 0.535           |

Legend: HR: hazard ratio; 95% CI: 95% confidence interval.
